# Supplementary material
Source: Oxford University Press journal article supplement (http://www.oxfordjournals.org/our_journals/ejechocard/supplements/vol6_1_x-xi.pdf)
Supplement: Supplementary file 1 [file vol6_1_x-xi.pdf]

## Abstract statistics

### Submitted and accepted abstracts by topic

| <i>Topic description</i>                 | <i>Submitted abstracts</i> |                   | <i>Accepted abstracts</i> |                   |
|------------------------------------------|----------------------------|-------------------|---------------------------|-------------------|
|                                          | <i>Number</i>              | <i>Percentage</i> | <i>Number</i>             | <i>Percentage</i> |
| 3-D Echo                                 | 40                         | 3.64%             | 30                        | 4.18%             |
| Atrial function and disease              | 26                         | 2.37%             | 18                        | 2.51%             |
| Congenital heart disease                 | 44                         | 4.01%             | 32                        | 4.46%             |
| Contrast echo                            | 55                         | 5.01%             | 40                        | 5.58%             |
| Coronary flow                            | 40                         | 3.64%             | 30                        | 4.18%             |
| Doppler myocardial imaging – LV function | 106                        | 9.65%             | 53                        | 7.39%             |
| Doppler myocardial imaging – other       | 35                         | 3.19%             | 30                        | 4.18%             |
| Doppler principles/haemodynamics         | 8                          | 0.73%             | 4                         | 0.56%             |
| Hand-held devices                        | 9                          | 0.82%             | 6                         | 0.84%             |
| Heart valve disease                      | 107                        | 9.74%             | 39                        | 5.44%             |
| Hypertension/LV hypertrophy              | 41                         | 3.73%             | 25                        | 3.49%             |
| Ischaemic heart disease                  | 64                         | 5.83%             | 56                        | 7.81%             |
| LV diastolic function                    | 65                         | 5.92%             | 36                        | 5.02%             |
| LV function – other                      | 57                         | 5.19%             | 40                        | 5.58%             |
| Cardiomyopathy/pericardial disease       | 47                         | 4.28%             | 39                        | 5.44%             |
| Heart failure                            | 52                         | 4.74%             | 32                        | 4.46%             |
| Heart failure – resynchronisation        | 46                         | 4.19%             | 38                        | 5.30%             |
| Source of embolism                       | 16                         | 1.46%             | 11                        | 1.53%             |
| Stress echo                              | 65                         | 5.92%             | 39                        | 5.44%             |
| The right heart                          | 47                         | 4.28%             | 38                        | 5.30%             |
| Transoesophageal echo                    | 25                         | 2.28%             | 13                        | 1.81%             |
| Perioperative/intensive care             | 6                          | 0.55%             | 2                         | 0.28%             |
| Ultrasound physics and engineering       | 9                          | 0.82%             | 8                         | 1.12%             |
| Vascular function/aortic disease         | 44                         | 4.01%             | 31                        | 4.32%             |
| Miscellaneous                            | 44                         | 4.01%             | 27                        | 3.77%             |
| <b>Total</b>                             | <b>1098</b>                | <b>100%</b>       | <b>717</b>                | <b>100%</b>       |

**Submitted abstracts by country**

| <i>Country</i>                        | <i>Submission</i> |             | <i>Percentage</i> |             |
|---------------------------------------|-------------------|-------------|-------------------|-------------|
|                                       | <i>2004</i>       | <i>2005</i> | <i>2004</i>       | <i>2005</i> |
| Algeria                               | 0                 | 1           | 0.00%             | 0.09%       |
| Argentina                             | 2                 | 2           | 0.22%             | 0.18%       |
| Armenia                               | 2                 | 0           | 0.22%             | 0.00%       |
| Australia                             | 1                 | 17          | 0.11%             | 1.55%       |
| Austria                               | 5                 | 7           | 0.55%             | 0.64%       |
| Belarus                               | 0                 | 2           | 0.00%             | 0.18%       |
| Belgium                               | 42                | 39          | 4.61%             | 3.55%       |
| Bosnia Herzegovina                    | 1                 | 0           | 0.11%             | 0.00%       |
| Brazil                                | 10                | 16          | 1.10%             | 1.46%       |
| Bulgaria                              | 5                 | 10          | 0.55%             | 0.91%       |
| Canada                                | 0                 | 1           | 0.00%             | 0.09%       |
| China, (Republic of)                  | 5                 | 6           | 0.55%             | 0.55%       |
| Croatia                               | 3                 | 3           | 0.33%             | 0.27%       |
| Cyprus                                | 2                 | 0           | 0.22%             | 0.00%       |
| Czech Republic                        | 20                | 17          | 2.20%             | 1.55%       |
| Denmark                               | 4                 | 5           | 0.44%             | 0.46%       |
| Egypt                                 | 9                 | 24          | 0.99%             | 2.19%       |
| Finland                               | 1                 | 5           | 0.11%             | 0.46%       |
| Former Yugoslav Republic of Macedonia | 3                 | 5           | 0.33%             | 0.46%       |
| France                                | 35                | 30          | 3.84%             | 2.73%       |
| Georgia, (Republic of)                | 6                 | 2           | 0.66%             | 0.18%       |
| Germany                               | 61                | 58          | 6.70%             | 5.28%       |
| Greece                                | 67                | 58          | 7.35%             | 5.28%       |
| Hong Kong                             | 2                 | 0           | 0.22%             | 0.00%       |
| Hungary                               | 21                | 31          | 2.31%             | 2.82%       |
| India                                 | 1                 | 2           | 0.11%             | 0.18%       |
| Iran (Islamic Republic of)            | 5                 | 13          | 0.55%             | 1.18%       |
| Ireland                               | 1                 | 1           | 0.11%             | 0.09%       |
| Israel                                | 19                | 13          | 2.09%             | 1.18%       |
| Italy                                 | 104               | 153         | 11.42%            | 13.93%      |
| Japan                                 | 5                 | 13          | 0.55%             | 1.18%       |
| Korea, (Republic of)                  | 16                | 24          | 1.76%             | 2.19%       |
| Kosovo                                | 4                 | 3           | 0.44%             | 0.27%       |
| Kuwait                                | 0                 | 2           | 0.00%             | 0.18%       |
| Lebanon                               | 0                 | 1           | 0.00%             | 0.09%       |
| Lithuania                             | 3                 | 2           | 0.33%             | 0.18%       |
| Luxembourg                            | 1                 | 0           | 0.11%             | 0.00%       |
| Malaysia                              | 0                 | 1           | 0.00%             | 0.09%       |
| Nepal                                 | 0                 | 1           | 0.00%             | 0.09%       |
| Norway                                | 19                | 22          | 2.09%             | 2.00%       |
| Poland                                | 116               | 125         | 12.73%            | 11.38%      |
| Portugal                              | 32                | 50          | 3.51%             | 4.55%       |
| Romania                               | 19                | 26          | 2.09%             | 2.37%       |
| Russian Federation                    | 20                | 14          | 2.20%             | 1.28%       |
| Saudi Arabia                          | 2                 | 1           | 0.22%             | 0.09%       |
| Serbia and Montenegro                 | 32                | 46          | 3.51%             | 4.19%       |
| Singapore                             | 1                 | 4           | 0.11%             | 0.36%       |
| South Africa                          | 0                 | 1           | 0.00%             | 0.09%       |
| Spain                                 | 53                | 62          | 5.82%             | 5.65%       |
| Sweden                                | 25                | 27          | 2.74%             | 2.46%       |
| Switzerland                           | 7                 | 9           | 0.77%             | 0.82%       |
| Taiwan, Province of China             | 1                 | 2           | 0.11%             | 0.18%       |
| The Netherlands                       | 9                 | 18          | 0.99%             | 1.64%       |
| Tunisia                               | 2                 | 1           | 0.22%             | 0.09%       |
| Turkey                                | 39                | 43          | 4.28%             | 3.92%       |
| Ukraine                               | 5                 | 5           | 0.55%             | 0.46%       |
| United Kingdom                        | 40                | 52          | 4.39%             | 4.74%       |
| United States of America              | 18                | 22          | 1.98%             | 2.00%       |
| Uzbekistan                            | 5                 | 0           | 0.55%             | 0.00%       |
| <b>Total</b>                          | <b>911</b>        | <b>1098</b> | <b>100%</b>       | <b>100%</b> |
